# Supplementary material for: A New Route to Enhance the Packing Density of Buckypaper for Superior Piezoresistive Sensor Characteristics
Source: MDPI journal article supplement (doi:10.3390/s20102904), 2020-05-20

# Size Distribution Report by Intensity

v2.2

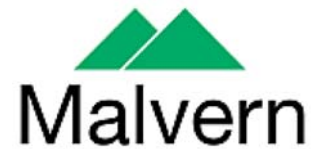

## Sample Details

Sample Name: 2 2

SOP Name: mansettings.nano

General Notes:

|                      |        |                            |                     |
|----------------------|--------|----------------------------|---------------------|
| File Name:           | 11.dts | Dispersant Name:           | Water               |
| Record Number:       | 21     | Dispersant RI:             | 1.330               |
| Material RI:         | 1.59   | Viscosity (cP):            | 0.8872              |
| Material Absorbtion: | 0.010  | Measurement Date and Time: | 2019年11月6日 14:09:25 |

## System

|                    |                           |                            |      |
|--------------------|---------------------------|----------------------------|------|
| Temperature (°C):  | 25.0                      | Duration Used (s):         | 50   |
| Count Rate (kcps): | 97.2                      | Measurement Position (mm): | 4.65 |
| Cell Description:  | Disposable sizing cuvette | Attenuator:                | 11   |

## Results

|                                | Size (r.nm...        | % Intensity: | St Dev (r.n... |
|--------------------------------|----------------------|--------------|----------------|
| <b>Z-Average (r.nm):</b> 241.0 | <b>Peak 1:</b> 450.9 | 75.8         | 232.7          |
| <b>Pdl:</b> 0.646              | <b>Peak 2:</b> 2164  | 12.2         | 476.5          |
| <b>Intercept:</b> 0.959        | <b>Peak 3:</b> 56.90 | 12.0         | 14.05          |

Result quality **Refer to quality report**

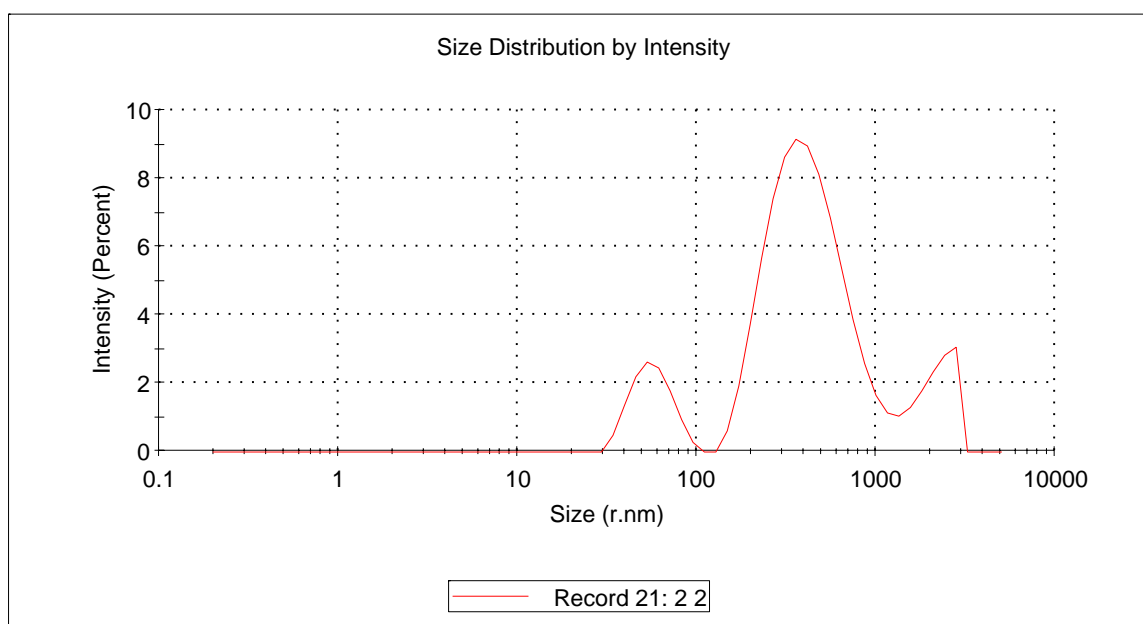

Supplement: s1 [file s1]
